# Supplementary material for: Low IGFBP7 expression identifies a subset of breast cancers with favorable prognosis and sensitivity to IGF-1 receptor targeting with ganitumab: Data from I-SPY2 and SCAN-B
Source: bioRxiv or medRxiv preprint supplement (doi:10.1101/2023.12.18.23300129), 2024-03-11

# Supplementary Figure 2

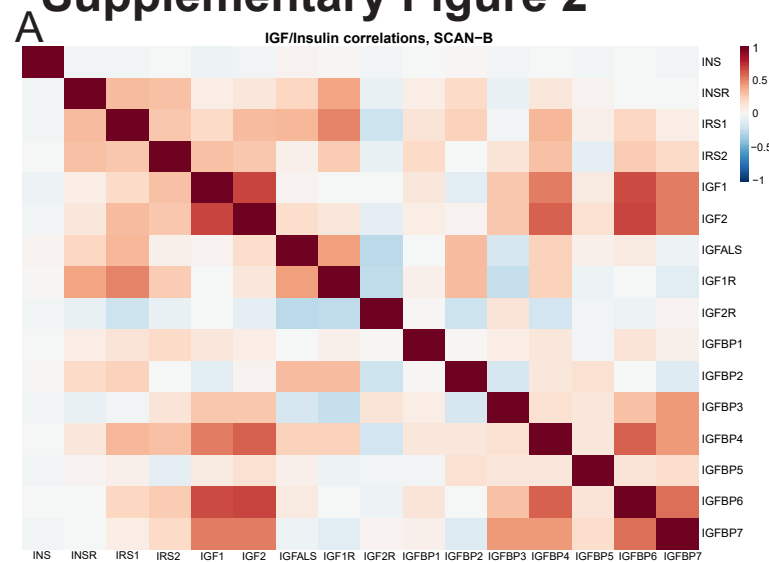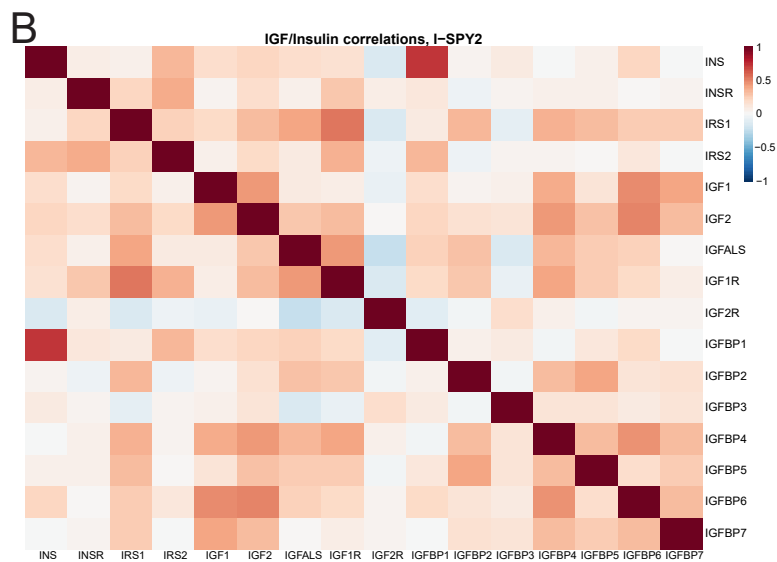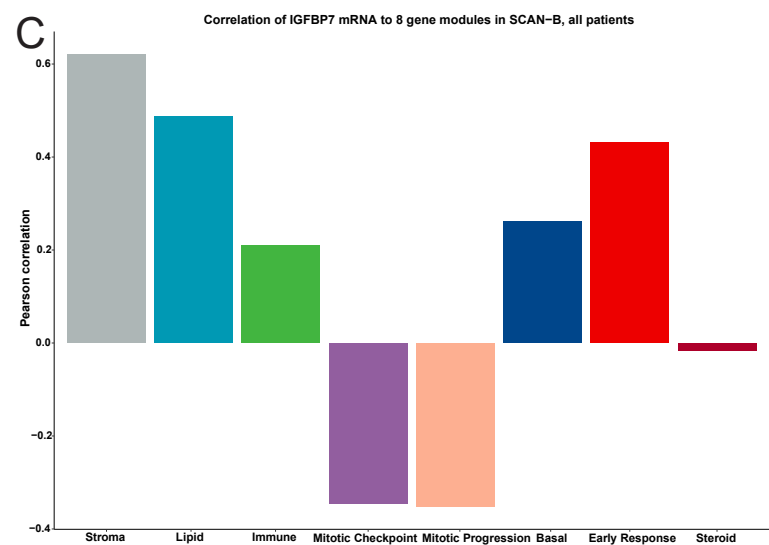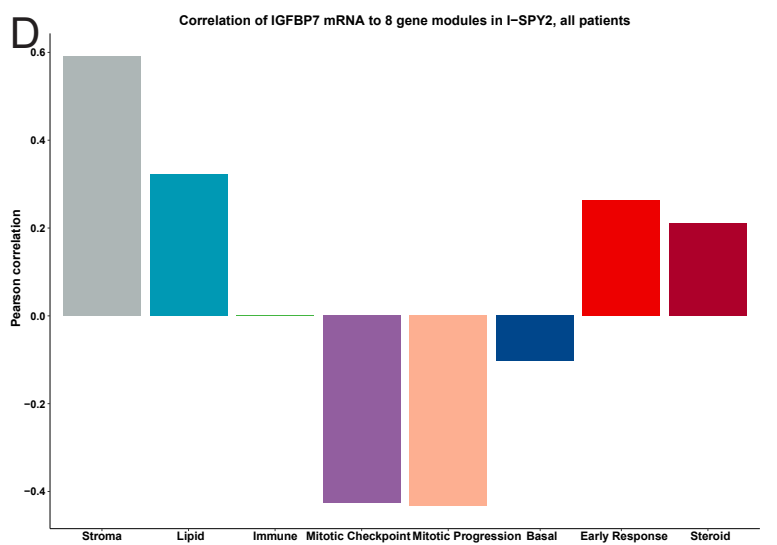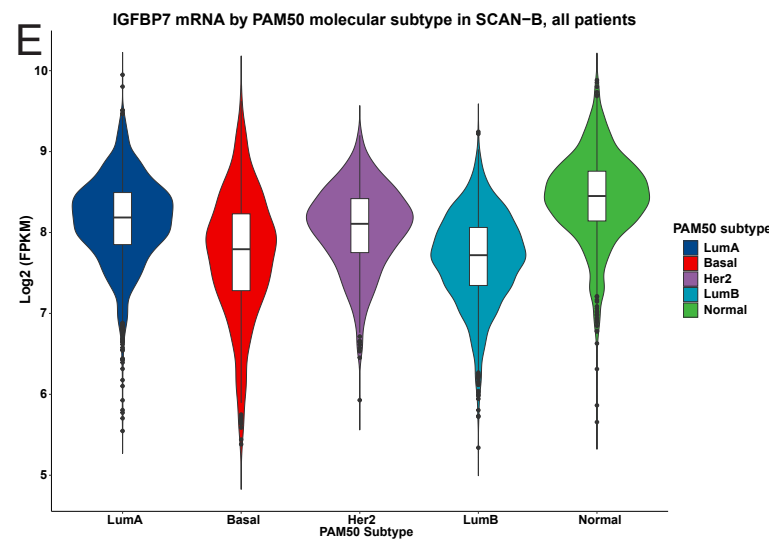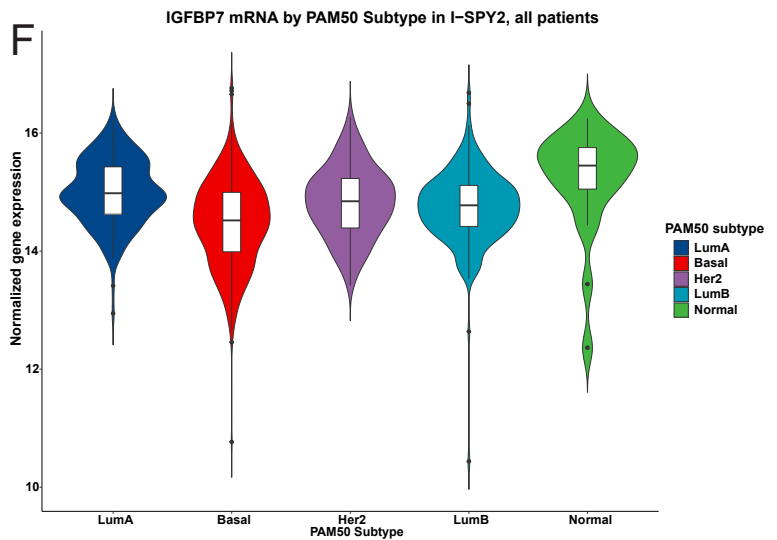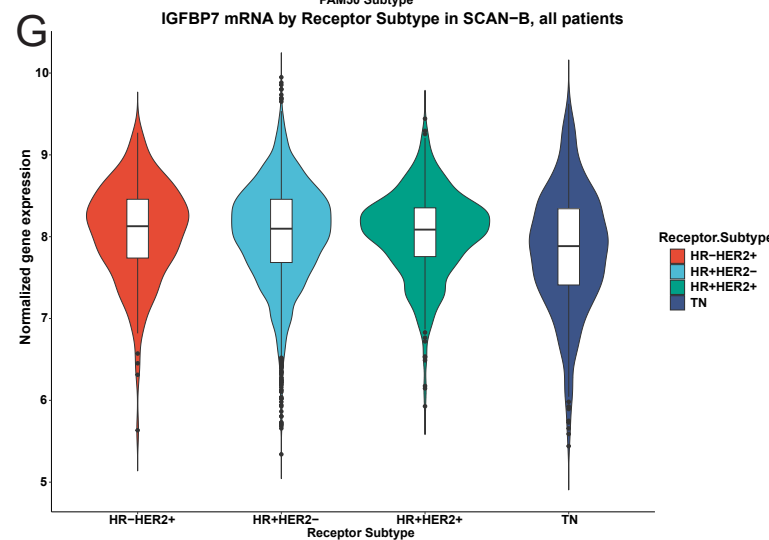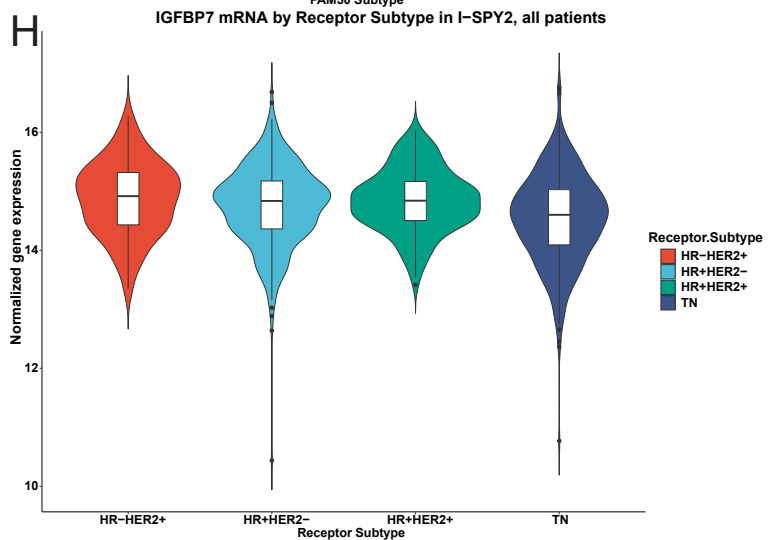

Supplement: Supplementary file [file media-4.pdf]
